# Supplementary material for: A Cyclopentanone Compound Attenuates the Over-Accumulation of Extracellular Matrix and Fibrosis in Diabetic Nephropathy via Downregulating the TGF-β/p38MAPK Axis
Source: MDPI journal article supplement (doi:10.3390/biomedicines10123270), 2022-12-16
Supplement: s1 [file s1]

# Supplementary Materials

**Table S1.** Primers used for transcript quantification qPCR.

| Species | Gene              | Accession Numbers | Forward Primer (5'-3')     | Reverse Primer (5'-3')     |
|---------|-------------------|-------------------|----------------------------|----------------------------|
| MS      | <i>E-cadherin</i> | NM_009864.3       | F: CAAGGACAGCCTTCTTTTCG    | R: TGGACTTCAGCGTCACTTTG    |
| MS      | <i>TGF-β1</i>     | NM_011577.2       | F: CTTCAATACGTCAGACATTCGGG | R: GTAACGCCAGGAATTGTTGCTA  |
| MS      | <i>Col IV</i>     | NM_007734.2       | F: GGTGGGAAAATGTGATCCTGG   | R: GCCTACGGATGGTTCTCCCT    |
| MS      | <i>α-SMA</i>      | NM_007392.3       | F: CTGACAGAGGCACCACTGAA    | R: CATCTCCAGAGTCCAGCACA    |
| MS      | <i>FN</i>         | NM_001276409.1    | F: GCTCAGCAAATCGTGCAGC     | R: CCATAGCAGGTACAAACCAGG   |
| MS      | <i>rps16</i>      | NM_013647.2       | F: CGTGCTTGTGCTCGGAGCTA    | R: GCTCCTTGCCCAGAAGCAAA    |
| HS      | <i>E-cadherin</i> | NM_001317186.1    | F: CTACCAGCCCCAAAGTGTGTG   | R: GTGTTATCGTGATTATCCGTGA  |
| HS      | <i>TGF-β1</i>     | NM_000660.6       | F: CTAATGGTGGAAACCCACAACG  | R: TATCGCCAGGAATTGTTGCTG   |
| HS      | <i>Col IV</i>     | NM_001303110.1    | F: GGGATGCTGTTGAAAGGTGAA   | R: GGTGGTCCGGTAAATCCTGG    |
| HS      | <i>FN</i>         | NM_001306130.1    | F: CGGTGGCTGTCAGTCAAAG     | R: AAACCTCGGCTTCCTCCATAA   |
| HS      | <i>α-SMA</i>      | NM_007392.3       | F: TTCAATGTCCCAGCCATGTA    | R: GAAGGAATAGCCACGCTCAG    |
| HS      | <i>rps16</i>      | NM_001020         | F: TGGTCTCATCAAGGTGAACG    | R: AAGTGAGTTTGTAGTCACGA    |
| Rn      | <i>E-cadherin</i> | NM_031334.1       | F: CATCACAGTCAAACGGCATC    | R: TGGGAAACGTGAGCAGCTCT    |
| Rn      | <i>TGF-β1</i>     | NM_021578.2       | F: CAACAATTCCTGGCGTTACCTTG | R: CGAAAGCCCTGTATTCCGTCTCC |
| Rn      | <i>Col IV</i>     | NM_001135009.1    | F: ATGTCCAAGGAAACGAGCGG    | R: GTTGTCCCCAGAGATAGGTG    |
| Rn      | <i>FN</i>         | NM_019143         | F: GCCTGAACCAGCCTACGGAT    | R: ATGACCACTGCCAAAGCCCAAG  |
| Rn      | <i>α-SMA</i>      | NM_031004         | F: CACCATCGGGAATGAACGCTTC  | R: CTGTCAGCAATGCCTGGGTA    |
| Rn      | <i>rps16</i>      | NM_001169146.1    | F: AAGTCTTCGGACGCAAGAAA    | R: TGCCCAGAAGCAGAACAG      |

**Table S2.** The docking parameters of H8 with TGF-β1, MAPKs, and AKT.

| Core Target | PDB ID | Absolute Energy | Conf Number | Relative Energy | LibDock Score |
|-------------|--------|-----------------|-------------|-----------------|---------------|
| p38MAPK     | 1bl7   | 67.752          | 15          | 8.0566          | 104.628       |
| ERK         | 6ge0   | 67.797          | 11          | 8.1016          | 71.1367       |
| JNK         | 4whz   | 69.9402         | 12          | 10.2448         | 101.828       |
| AKT         | 3cqu   | 77.2302         | 14          | 17.5348         | 101.055       |
| TGF-β1      | 1py5   | 75.7904         | 13          | 16.0951         | 113.137       |

**Notes:** Based on the simulation analysis, the parameters, such as the absolute energy, the number of docking postures (Conf Number), the relative energy, and the comprehensive score of Libdock (LibDock score), were obtained. The lower absolute and relative energy between the inhibitor and the docking site indicates a stronger inhibitory effect of the inhibitor on the target protein, and the greater the number of Conf Number manifestes a greater possibility of an interaction of the inhibitor with the site. Finally, a higher LibDock score indicates a stronger inhibitory effect of the inhibitor. It is not difficult to see that the absolute energy and relative energy of H8 and p38MAPK are relatively low, and the comprehensive scores are relative high, indicating that H8 not only has affinity for TGF-β1, but also has better affinity for downstream signal p38MAPK.

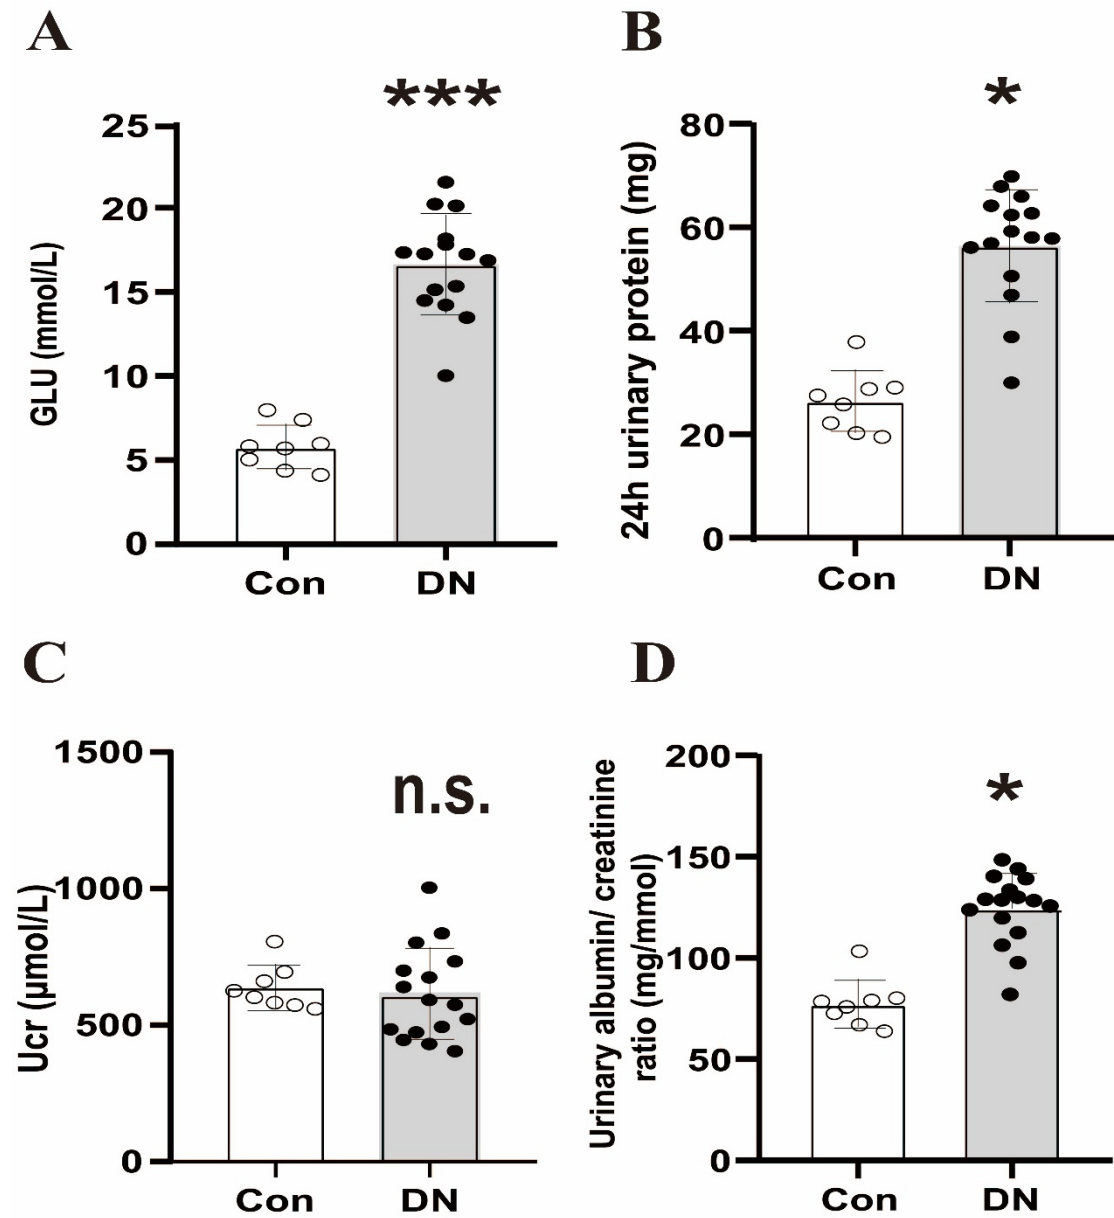

**Figure S1.** Identification of DN model rats. (A) GLU (mmol/L). (B) 24 h urinary protein (mg). (C) Ucr ( $\mu\text{mol/L}$ ). (D) Urinary albumin/creatinine ratio (mg/mmol). Data are shown as mean  $\pm$  S.D. (Con  $n = 8$ , diabetic rats  $n = 16$ ). \*  $p < 0.05$ , \*\*\*  $p < 0.001$  compare to Con group. Con represents Control group and n.s. means no significant difference in statistics compared to Con group.

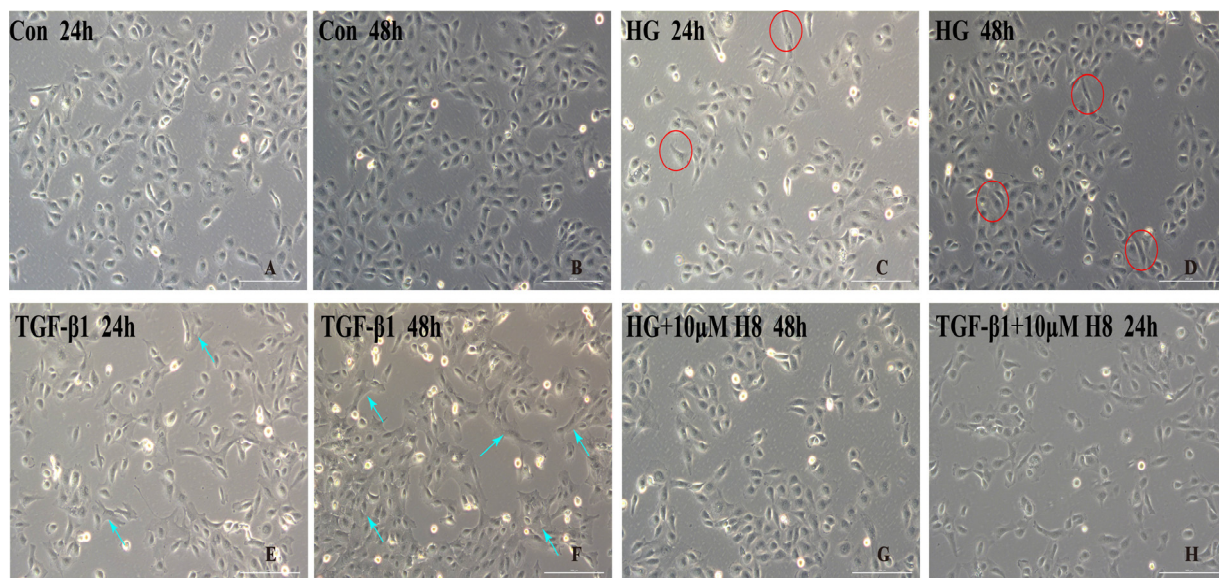

**Figure S2.** Cell morphology changes of damaged HK-2 cells. (A) Con group, 24 h. (B) Con group, 48 h. (C) HG group, 24 h. (D) HG group, 48 h. (E) TGF- $\beta$ 1 group, 24 h. (F) TGF- $\beta$ 1 group, 48 h. (G) HG+ 10  $\mu$ M H8 group, 48 h. (H) TGF- $\beta$ 1+ 10  $\mu$ M H8 group, 24 h. Red circle and blue arrows represent the damaged HK-2 cells; HG concentration: 35 mM; TGF- $\beta$ 1 concentration: 10 ng/mL; scale bars: 250  $\mu$ m.
